# Supplementary material for: A Comprehensive Landscape of Imaging Feature-Associated RNA Expression Profiles in Human Breast Tissue
Source: MDPI journal article supplement (doi:10.3390/s23031432), 2023-01-28
Supplement: s1 [file s1]

## Supplementary Material

### 1 Supplementary Figures and Tables

#### 1.1 Supplementary Figures

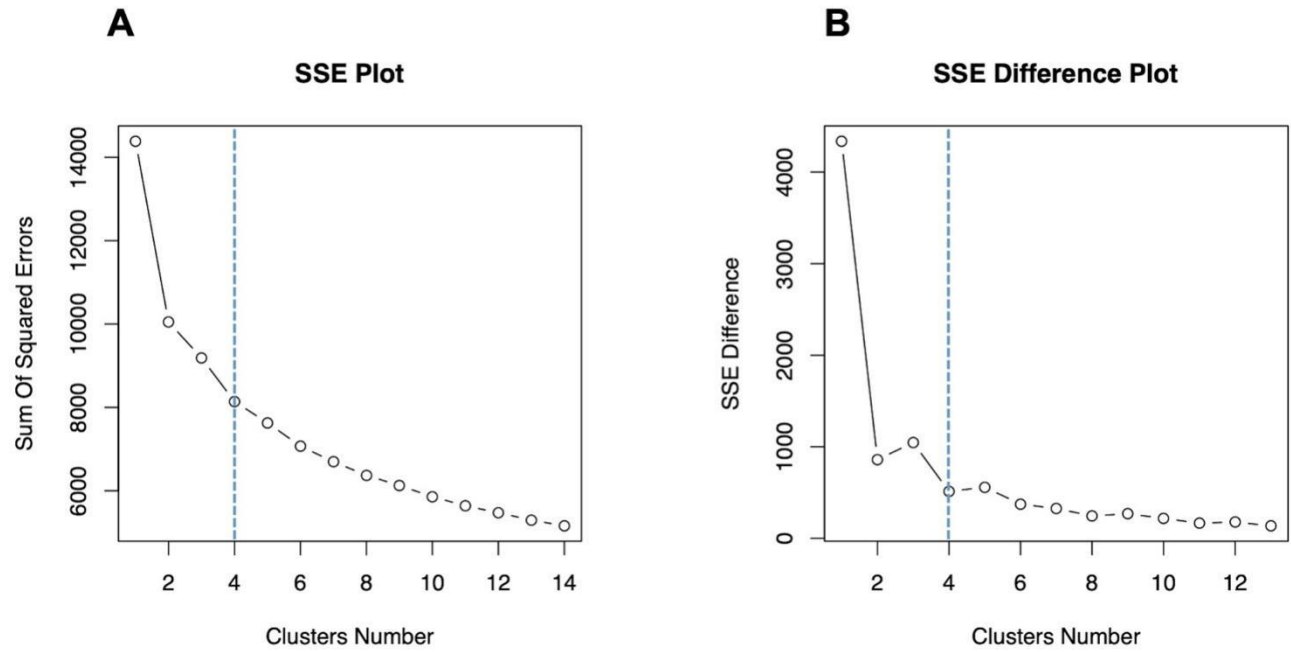

**FIGURE S1** Plots of sum of squared errors (A) and SSE difference (B) of k-means with  $k=1,2,\dots,14$ . We choose  $k=4$  at the elbow of the curve.

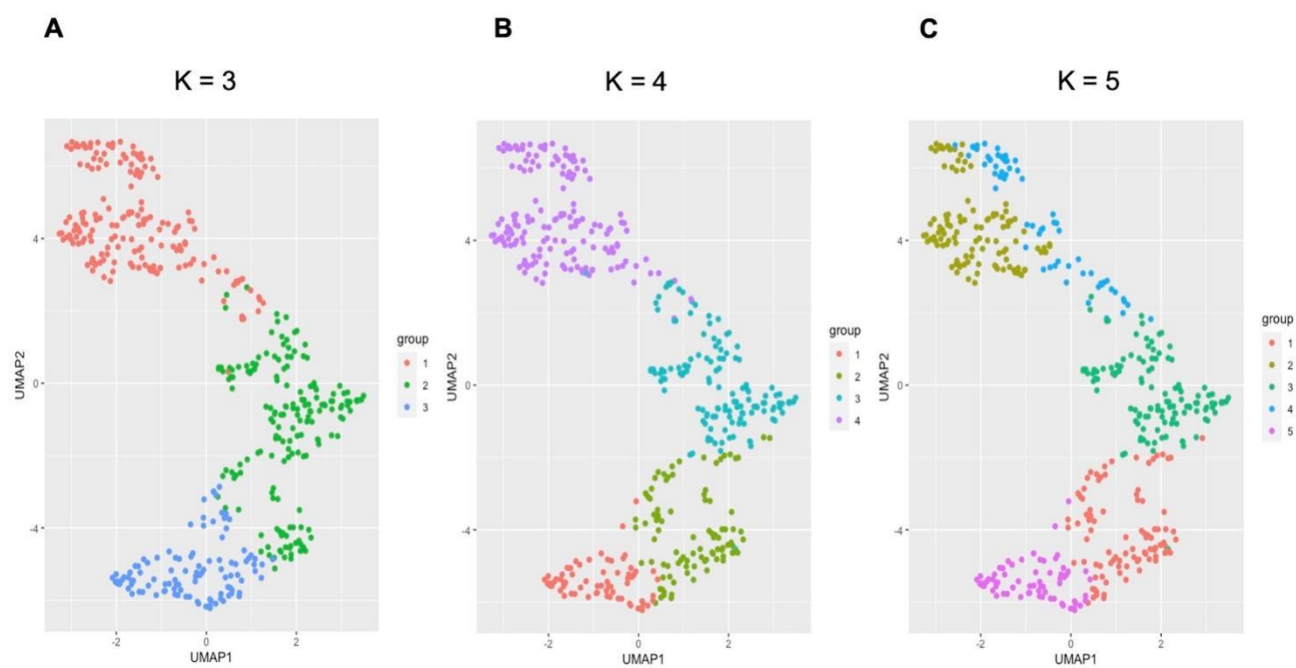

**FIGURE S2** The UMAP plot of k-means clustering results with  $k=3, 4, 5$ .

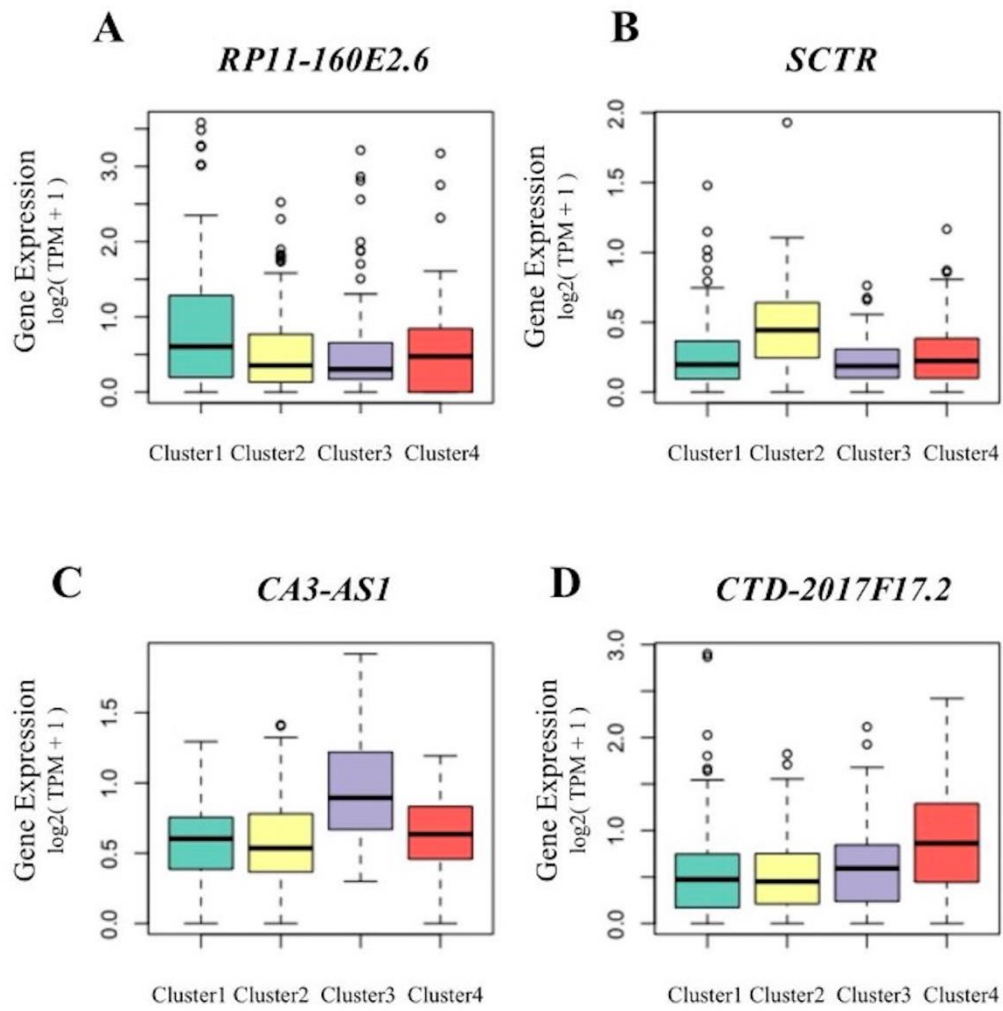

**FIGURE S3** The boxplot of the top genes which specify to Cluster 1 (A), Cluster 2 (B), Cluster 3 (C), Cluster 4 (D) respectively. The circles in the boxplot represent outliers in the data.

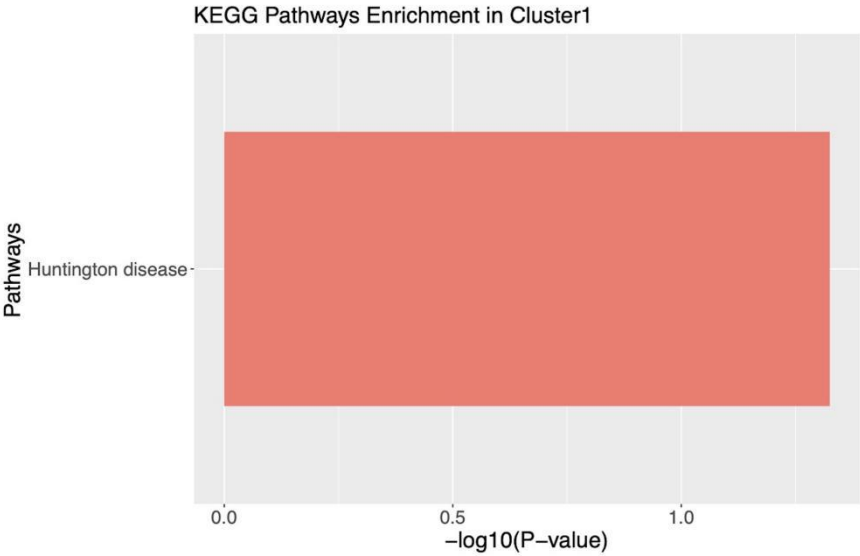

**FIGURE S4** Visualization of enrichment analysis in Cluster1. Bar graph of significant pathways in KEGG analysis.

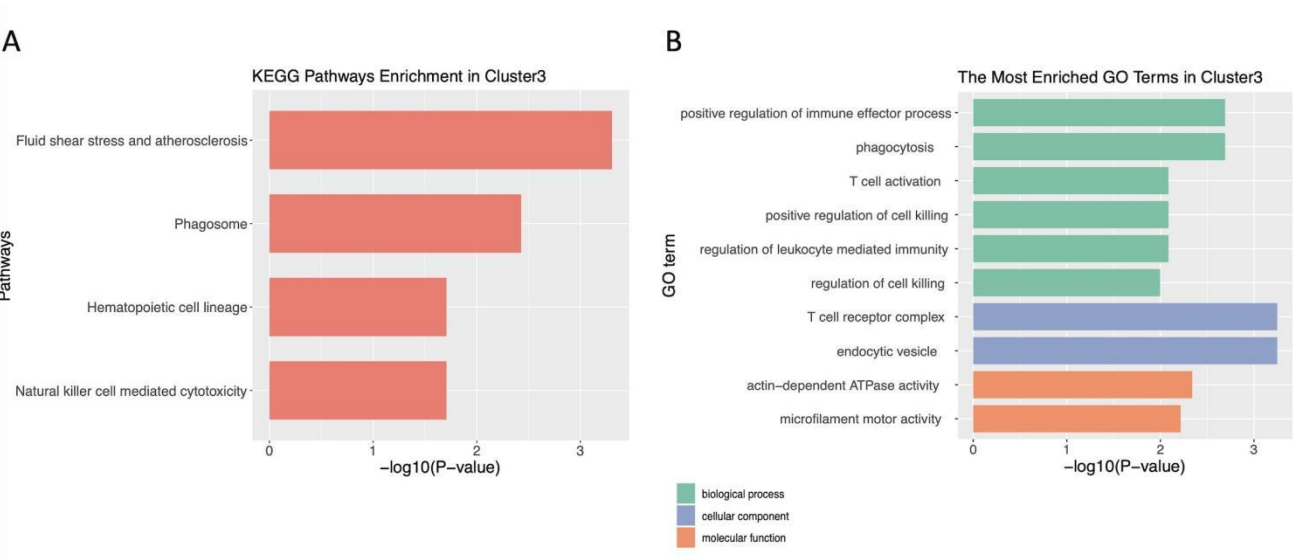

**FIGURE S5** Visualization of enrichment analysis in Cluster3. (A) Bar graph of significant pathways in KEGG analysis (B) Bar graph of significant pathways in GO analysis.

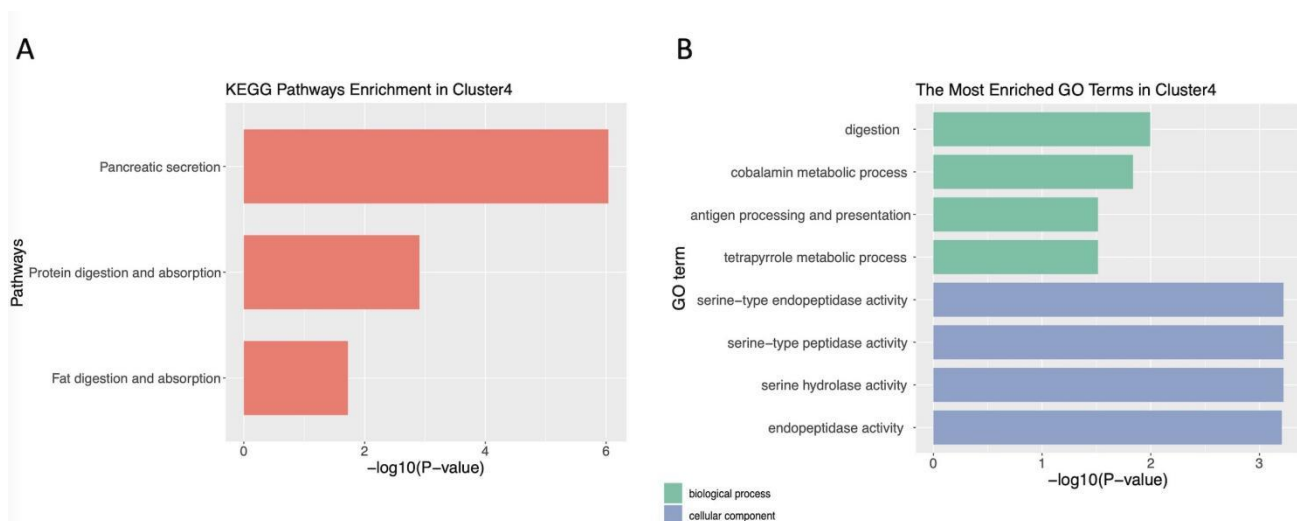

**FIGURE S6** Visualization of enrichment analysis in Cluster4. (A) Bar graph of significant pathways in KEGG analysis (B) Bar graph of significant pathways in GO analysis.

## 1.2 Supplementary Tables

**Table S1** Explanations of image features.

| Feature Type | Feature Name                                                                            | Feature Explanations                                                                                                                                    |
|--------------|-----------------------------------------------------------------------------------------|---------------------------------------------------------------------------------------------------------------------------------------------------------|
| Shape        | Centroid                                                                                | Centroid of the object                                                                                                                                  |
|              | Circularity/Roundness                                                                   | Quantify how close the object should be to a true circle. It is the ratio of the area of the equivalent hypersphere to the measured area of the object. |
|              | Elongation                                                                              | Ratio of the longest physical size of the object on one dimension and its smallest physical size                                                        |
|              | EquivalentEllipsoidDiameter, EquivalentEllipsoidDiameter0, EquivalentEllipsoidDiameter1 | Diameters of the ellipsoid of the same size and the same ratio on all the axes of the object                                                            |
|              | EquivalentSphericalPerimeter                                                            | Equivalent perimeter of the hypersphere of the same size of the object                                                                                  |

|                   |                                                           |                                                                                          |
|-------------------|-----------------------------------------------------------|------------------------------------------------------------------------------------------|
|                   | EquivalentSphericalRadius                                 | Equivalent radius of the hypersphere of the same size of the object                      |
|                   | FeretDiameter                                             | Diameter in physical units of the sphere which include all the object                    |
|                   | Flatness                                                  | Degree to which the object approximates the hyperplane                                   |
|                   | MajorAxis, MinorAxis                                      | Longest/shortest diameter of the object                                                  |
|                   | Perimeter                                                 | Perimeter of the object                                                                  |
|                   | PerimeterOnBorderRatio                                    | Ratio of perimeter of object which are on the border of the image to the whole perimeter |
|                   | PrincipalAxes                                             | Principle axes of the object                                                             |
|                   | PrincipalMoments, PrincipalMoments0, PrincipalMoments1    | Principle moments of the object                                                          |
| Size              | AreaInPixels, NumberOfPixels                              | Area of the object in terms of number of pixels                                          |
|                   | NumberOfPixelsOnBorder                                    | Number of pixels of object which are on the border of the image                          |
|                   | PerimeterOnBorder                                         | Perimeter of object which are on the border of the image                                 |
|                   | PhysicalSize                                              | Size of the object in physical unit                                                      |
| Texture/Intensity | Intensity_[Mean/Max/Min/Std] or Mean[R/G/B] or Std[R/G/B] | Mean/Max/Min/Std statistics of the intensity values in the object of R/G/B channels      |

|          |                                                                               |                                                                                                         |
|----------|-------------------------------------------------------------------------------|---------------------------------------------------------------------------------------------------------|
|          | IntensityKurtosis                                                             | Kurtosis of the intensity values in the object of R/G/B channels                                        |
|          | IntensityEnergy, IntensityEntropy                                             | Energy and entropy of the intensity values in the object of R/G/B channels                              |
|          | GradientEnergy, GradientEntropy                                               | Energy and entropy of the intensity values in the gradient image of object of R/G/B channels            |
|          | GradientMean, GradientStd, GradientSkewness, GradientKurtosis                 | Mean/Std/Skewness/Kurtosis of the intensity values in the gradient image of object of R/G/B channels    |
|          | CannyMean                                                                     | Average of canny value of the object                                                                    |
|          | CannyNonZero                                                                  | Number of pixel with nonzero canny value of the object                                                  |
|          | cytoCannyMean                                                                 | Average of canny value of the cytoplasm                                                                 |
|          | cytoCannyNonZero                                                              | Number of pixel with nonzero canny value of the cytoplasm                                               |
|          | cytoGradientEnergy, cytoGradientEntropy                                       | Energy and entropy of the intensity values in the gradient image of cytoplasm of R/G/B channels         |
|          | cytoGradientMean, cytoGradientStd, cytoGradientSkewness, cytoGradientKurtosis | Mean/Std/Skewness/Kurtosis of the intensity values in the gradient image of cytoplasm of R/G/B channels |
|          | cytoIntensityEnergy, cytoIntensityEntropy                                     | Energy and entropy of the intensity values in the gradient image of cytoplasm of R/G/B channels         |
| Distance | density_neighbors_in_distance_[0, 1, 2, 3, 4]                                 | Neighbor count within given radius                                                                      |

**Table S2** List of top 25 genes, which are ranked according to T1, specify for each cluster.

|          | <b>Genes</b>         | <b>T1-based FDR</b> | <b>T2-based FDR</b> |
|----------|----------------------|---------------------|---------------------|
| Cluster1 | <i>RP11-160E2.6</i>  | 4.970E-07           | 8.002E-01           |
|          | <i>MATN3</i>         | 5.090E-07           | 6.586E-01           |
|          | <i>FOXD3-AS1</i>     | 1.170E-06           | 6.229E-01           |
|          | <i>RP11-693J15.6</i> | 5.460E-06           | 6.195E-01           |
|          | <i>ST6GALNAC1</i>    | 5.650E-06           | 7.396E-01           |
|          | <i>RNY3P8</i>        | 1.300E-05           | 6.195E-01           |
|          | <i>SOX2</i>          | 1.370E-05           | 8.288E-01           |
|          | <i>RAET1E</i>        | 3.280E-05           | 6.195E-01           |
|          | <i>TUBB4A</i>        | 3.280E-05           | 7.567E-01           |
|          | <i>RP11-432J24.5</i> | 5.030E-05           | 6.210E-01           |
|          | <i>PDCD10</i>        | 5.520E-05           | 6.195E-01           |
|          | <i>MT3</i>           | 6.870E-05           | 6.195E-01           |
|          | <i>C3orf80</i>       | 8.060E-05           | 8.755E-01           |
|          | <i>TVP23CP2</i>      | 1.339E-04           | 7.766E-01           |
|          | <i>ALLC</i>          | 1.444E-04           | 6.195E-01           |
|          | <i>ENY2</i>          | 1.573E-04           | 8.204E-01           |



|          |                      |           |           |
|----------|----------------------|-----------|-----------|
|          | <i>KIRREL-IT1</i>    | 1.645E-04 | 9.734E-01 |
|          | <i>LINC00359</i>     | 2.518E-04 | 6.195E-01 |
|          | <i>RNU6-415P</i>     | 2.784E-04 | 8.607E-01 |
|          | <i>FRY</i>           | 3.126E-04 | 7.375E-01 |
|          | <i>RP11-779O18.1</i> | 3.619E-04 | 6.195E-01 |
|          | <i>RP11-620J15.4</i> | 3.816E-04 | 9.095E-01 |
|          | <i>NPY1R</i>         | 4.436E-04 | 6.195E-01 |
|          | <i>FAM153B</i>       | 4.439E-04 | 6.249E-01 |
|          | <i>RP11-372K14.2</i> | 5.468E-04 | 6.461E-01 |
| Cluster2 | <i>SCTR</i>          | 0.000E+00 | 6.195E-01 |
|          | <i>NIPSNAP3B</i>     | 8.840E-13 | 6.195E-01 |
|          | <i>AC006033.22</i>   | 4.870E-12 | 6.195E-01 |
|          | <i>MT-TM</i>         | 1.700E-10 | 6.247E-01 |
|          | <i>IGF2BP2</i>       | 3.260E-10 | 7.218E-01 |
|          | <i>CHST2</i>         | 6.640E-10 | 6.195E-01 |
|          | <i>ADAMTS12</i>      | 9.970E-10 | 6.195E-01 |
|          | <i>TENM1</i>         | 2.120E-09 | 6.210E-01 |
|          | <i>RP11-178L8.7</i>  | 2.390E-09 | 6.195E-01 |
|          | <i>RP11-414H17.5</i> | 2.570E-09 | 6.308E-01 |

|          |                      |           |           |
|----------|----------------------|-----------|-----------|
|          | <i>HBQ1</i>          | 3.060E-09 | 6.586E-01 |
|          | <i>CTA-242H14.1</i>  | 7.500E-09 | 8.755E-01 |
|          | <i>ITGAM</i>         | 7.500E-09 | 6.195E-01 |
|          | <i>AC022007.5</i>    | 9.520E-09 | 6.195E-01 |
|          | <i>VEGFA</i>         | 1.100E-08 | 6.586E-01 |
|          | <i>CSTB</i>          | 1.510E-08 | 6.689E-01 |
|          | <i>SMOC1</i>         | 1.730E-08 | 7.759E-01 |
|          | <i>RP11-366M4.11</i> | 1.730E-08 | 6.960E-01 |
|          | <i>DNAH9</i>         | 1.860E-08 | 6.238E-01 |
|          | <i>APOE</i>          | 3.250E-08 | 6.443E-01 |
|          | <i>VNN2</i>          | 3.520E-08 | 6.195E-01 |
|          | <i>FAM27E2</i>       | 7.080E-08 | 6.210E-01 |
|          | <i>CRYAB</i>         | 7.290E-08 | 6.247E-01 |
|          | <i>NCF4</i>          | 1.070E-07 | 6.203E-01 |
|          | <i>GIPR</i>          | 1.070E-07 | 6.195E-01 |
| Cluster3 | <i>CA3-ASI</i>       | 3.210E-13 | 6.195E-01 |
|          | <i>PLB1</i>          | 8.840E-13 | 6.247E-01 |
|          | <i>TRBV3-1</i>       | 2.310E-12 | 6.244E-01 |
|          | <i>PRADC1P1</i>      | 4.020E-12 | 6.195E-01 |

|  |                          |           |           |
|--|--------------------------|-----------|-----------|
|  | <i>TRBJ2-1</i>           | 5.250E-11 | 6.238E-01 |
|  | <i>IGFBP1</i>            | 1.170E-10 | 6.577E-01 |
|  | <i>EIF1P4</i>            | 2.120E-10 | 1.000E+00 |
|  | <i>RUFY4</i>             | 4.020E-10 | 6.195E-01 |
|  | <i>SLC39A12</i>          | 6.640E-10 | 6.690E-01 |
|  | <i>LINC00861</i>         | 6.960E-10 | 6.318E-01 |
|  | <i>RP11-61A14.1</i>      | 9.970E-10 | 6.195E-01 |
|  | <i>TRBV28</i>            | 1.380E-09 | 9.027E-01 |
|  | <i>CHI3L2</i>            | 2.000E-09 | 6.195E-01 |
|  | <i>KLRB1</i>             | 2.120E-09 | 6.195E-01 |
|  | <i>RP11-111M22.3</i>     | 2.120E-09 | 6.247E-01 |
|  | <i>HIST1H2BK</i>         | 2.780E-09 | 6.195E-01 |
|  | <i>AC060834.2</i>        | 2.930E-09 | 6.195E-01 |
|  | <i>CTD-2161E19.1</i>     | 3.260E-09 | 6.247E-01 |
|  | <i>RP11-521D12.5</i>     | 6.060E-09 | 6.247E-01 |
|  | <i>DUXAP10</i>           | 6.060E-09 | 6.229E-01 |
|  | <i>RP11-67L3.4</i>       | 7.500E-09 | 6.195E-01 |
|  | <i>LL22NC03-N14H11.1</i> | 9.520E-09 | 6.195E-01 |
|  | <i>C11orf21</i>          | 1.310E-08 | 6.214E-01 |

|          |                      |           |           |
|----------|----------------------|-----------|-----------|
|          | <i>TUBB8P11</i>      | 1.730E-08 | 6.195E-01 |
|          | <i>DNPH1</i>         | 1.770E-08 | 6.586E-01 |
| Cluster4 | <i>CTD-2017F17.2</i> | 1.040E-06 | 6.210E-01 |
|          | <i>GSE1</i>          | 3.890E-06 | 6.249E-01 |
|          | <i>GTPBP2</i>        | 7.600E-06 | 6.518E-01 |
|          | <i>RAB35</i>         | 4.000E-05 | 6.477E-01 |
|          | <i>RP11-331F4.4</i>  | 5.500E-05 | 9.265E-01 |
|          | <i>CELA3B</i>        | 5.630E-05 | 8.204E-01 |
|          | <i>LINC00294</i>     | 7.630E-05 | 9.995E-01 |
|          | <i>TMEM214</i>       | 7.650E-05 | 8.894E-01 |
|          | <i>AMY2A</i>         | 8.880E-05 | 8.956E-01 |
|          | <i>PAFAH1B2</i>      | 1.097E-04 | 6.195E-01 |
|          | <i>TPD52L2</i>       | 1.123E-04 | 6.195E-01 |
|          | <i>RP3-404F18.5</i>  | 1.207E-04 | 7.419E-01 |
|          | <i>RP11-346C20.3</i> | 1.327E-04 | 7.060E-01 |
|          | <i>ANKDD1A</i>       | 1.442E-04 | 6.195E-01 |
|          | <i>RP11-229P13.2</i> | 1.584E-04 | 6.195E-01 |

|  |                 |           |           |
|--|-----------------|-----------|-----------|
|  | <i>CTRB2</i>    | 2.129E-04 | 9.906E-01 |
|  | <i>CELA2A</i>   | 2.147E-04 | 9.689E-01 |
|  | <i>NT5C3AP1</i> | 2.364E-04 | 6.195E-01 |
|  | <i>RMND5A</i>   | 2.643E-04 | 7.008E-01 |
|  | <i>SYCN</i>     | 2.693E-04 | 9.345E-01 |
|  | <i>C11orf53</i> | 2.890E-04 | 8.894E-01 |
|  | <i>CTRB1</i>    | 3.034E-04 | 8.768E-01 |
|  | <i>BAK1P2</i>   | 3.132E-04 | 6.247E-01 |
|  | <i>NUP210P3</i> | 3.170E-04 | 6.195E-01 |
|  | <i>EDEM2</i>    | 3.345E-04 | 8.869E-01 |

**Table S3** List of pathways discovered by the specific genes of each cluster by Reactome, which P-value is less than 0.05.

|          | Pathway name                                                             | Entities P-value | Entities FDR |
|----------|--------------------------------------------------------------------------|------------------|--------------|
| Cluster1 | LGI-ADAM interactions                                                    | 3.940E-04        | 1.938E-01    |
|          | RUNX1 regulates transcription of genes involved in interleukin signaling | 2.283E-03        | 4.264E-01    |
|          | NoRC negatively regulates rRNA expression                                | 8.584E-03        | 4.264E-01    |
|          | Negative epigenetic regulation of rRNA expression                        | 1.229E-02        | 4.264E-01    |

|  |                                                                        |           |           |
|--|------------------------------------------------------------------------|-----------|-----------|
|  | Mitochondrial translation termination                                  | 1.473E-02 | 4.264E-01 |
|  | Mitochondrial translation elongation                                   | 1.473E-02 | 4.264E-01 |
|  | Mitochondrial translation initiation                                   | 1.578E-02 | 4.264E-01 |
|  | Mitochondrial translation                                              | 1.923E-02 | 4.264E-01 |
|  | Germ layer formation at gastrulation                                   | 2.405E-02 | 4.264E-01 |
|  | HDACs deacetylate histones                                             | 2.528E-02 | 4.264E-01 |
|  | COPI-independent Golgi-to-ER retrograde traffic                        | 2.528E-02 | 4.264E-01 |
|  | Intestinal infectious diseases                                         | 2.929E-02 | 4.264E-01 |
|  | Prefoldin mediated transfer of substrate to CCT/TriC                   | 3.402E-02 | 4.264E-01 |
|  | Estrogen-dependent nuclear events downstream of ESR-membrane signaling | 3.402E-02 | 4.264E-01 |
|  | Regulation of RAS by GAPs                                              | 3.420E-02 | 4.264E-01 |
|  | Hedgehog 'off' state                                                   | 3.565E-02 | 4.264E-01 |
|  | Defective ALG14 causes ALG14-CMS                                       | 3.886E-02 | 4.264E-01 |

|           |                                                                                     |           |           |
|-----------|-------------------------------------------------------------------------------------|-----------|-----------|
|           | HSP90 chaperone cycle for steroid hormone receptors (SHR) in the presence of ligand | 4.049E-02 | 4.264E-01 |
| Cluster 2 | Neutrophil degranulation                                                            | 8.200E-04 | 3.346E-01 |
|           | tRNA processing in the mitochondrion                                                | 1.221E-03 | 3.346E-01 |
|           | Chemokine receptors bind chemokines                                                 | 3.911E-03 | 5.558E-01 |
|           | rRNA processing in the mitochondrion                                                | 4.057E-03 | 5.558E-01 |
|           | VEGF ligand-receptor interactions                                                   | 1.844E-02 | 7.448E-01 |
|           | VEGF binds to VEGFR leading to receptor dimerization                                | 1.844E-02 | 7.448E-01 |
|           | Interleukin-4 and Interleukin-13 signaling                                          | 2.239E-02 | 7.448E-01 |
|           | HDL remodeling                                                                      | 2.475E-02 | 7.448E-01 |
|           | NR1H3 & NR1H2 regulate gene expression linked to cholesterol transport and efflux   | 2.915E-02 | 7.448E-01 |
|           | Signaling by VEGF                                                                   | 3.017E-02 | 7.448E-01 |
|           | Alpha-defensins                                                                     | 3.317E-02 | 7.448E-01 |
|           | Hypusine synthesis from eIF5A-lysine                                                | 3.882E-02 | 7.448E-01 |
|           | mRNA Editing                                                                        | 3.882E-02 | 7.448E-01 |

|           |                                                                                |           |           |
|-----------|--------------------------------------------------------------------------------|-----------|-----------|
|           | Peptide ligand-binding receptors                                               | 3.951E-02 | 7.448E-01 |
|           | Cross-presentation of particulate exogenous antigens (phagosomes)              | 4.481E-02 | 7.448E-01 |
|           | Transcriptional regulation by the AP-2 (TFAP2) family of transcription factors | 4.664E-02 | 7.448E-01 |
|           | DAP12 interactions                                                             | 4.936E-02 | 7.448E-01 |
| Cluster 3 | RNA Polymerase I Promoter Opening                                              | 4.640E-04 | 2.766E-01 |
|           | DNA methylation                                                                | 6.710E-04 | 2.766E-01 |
|           | Assembly of the ORC complex at the origin of replication                       | 1.305E-03 | 2.766E-01 |
|           | Packaging Of Telomere Ends                                                     | 2.193E-03 | 2.766E-01 |
|           | PRC2 methylates histones and DNA                                               | 2.344E-03 | 2.766E-01 |
|           | Condensation of Prophase Chromosomes                                           | 2.592E-03 | 2.766E-01 |
|           | SIRT1 negatively regulates rRNA expression                                     | 2.685E-03 | 2.766E-01 |
|           | Meiotic recombination                                                          | 3.658E-03 | 2.766E-01 |
|           | Interleukin-1 processing                                                       | 3.726E-03 | 2.766E-01 |
|           | ERCC6 (CSB) and EHMT2 (G9a)                                                    | 3.942E-03 | 2.766E-01 |



|  |                                                                                                 |           |           |
|--|-------------------------------------------------------------------------------------------------|-----------|-----------|
|  | positively regulate rRNA expression                                                             |           |           |
|  | Transcriptional regulation of granulopoiesis                                                    | 4.416E-03 | 2.766E-01 |
|  | Activated PKN1 stimulates transcription of AR (androgen receptor) regulated genes KLK2 and KLK3 | 4.449E-03 | 2.766E-01 |
|  | Recognition and association of DNA glycosylase with site containing an affected purine          | 4.610E-03 | 2.766E-01 |
|  | B-WICH complex positively regulates rRNA expression                                             | 5.580E-03 | 3.008E-01 |
|  | HDACs deacetylate histones                                                                      | 6.165E-03 | 3.008E-01 |
|  | Defective pyroptosis                                                                            | 6.273E-03 | 3.008E-01 |
|  | Recognition and association of DNA glycosylase with site containing an affected pyrimidine      | 6.801E-03 | 3.008E-01 |
|  | Nucleosome assembly                                                                             | 7.771E-03 | 3.008E-01 |
|  | Deposition of new CENPA-containing nucleosomes at the centromere                                | 7.771E-03 | 3.008E-01 |
|  | RUNX1 regulates genes involved in megakaryocyte                                                 | 8.266E-03 | 3.008E-01 |

|  |                                                           |           |           |
|--|-----------------------------------------------------------|-----------|-----------|
|  | differentiation and platelet function                     |           |           |
|  | Defective CSF2RB causes SMDP5                             | 8.596E-03 | 3.008E-01 |
|  | Defective CSF2RA causes SMDP4                             | 8.596E-03 | 3.008E-01 |
|  | CLEC7A/inflammasome pathway                               | 8.596E-03 | 3.008E-01 |
|  | Formation of the beta-catenin:TCF transactivating complex | 8.986E-03 | 3.055E-01 |
|  | Cleavage of the damaged purine                            | 9.684E-03 | 3.099E-01 |
|  | Depurination                                              | 1.082E-02 | 3.354E-01 |
|  | DNA Damage/Telomere Stress Induced Senescence             | 1.269E-02 | 3.807E-01 |
|  | Inhibition of DNA recombination at telomere               | 1.337E-02 | 3.877E-01 |
|  | RNA Polymerase I Promoter Escape                          | 1.518E-02 | 4.250E-01 |
|  | Meiotic synapsis                                          | 1.655E-02 | 4.303E-01 |
|  | Cleavage of the damaged pyrimidine                        | 1.797E-02 | 4.492E-01 |
|  | Depyrimidination                                          | 1.797E-02 | 4.492E-01 |
|  | Formation of annular gap junctions                        | 1.996E-02 | 4.791E-01 |

|           |                                                       |           |           |
|-----------|-------------------------------------------------------|-----------|-----------|
|           | Senescence-Associated Secretory Phenotype (SASP)      | 2.166E-02 | 4.982E-01 |
|           | Meiosis                                               | 2.312E-02 | 5.085E-01 |
|           | Gap junction degradation                              | 2.497E-02 | 5.243E-01 |
|           | Positive epigenetic regulation of rRNA expression     | 2.501E-02 | 5.253E-01 |
|           | HATs acetylate histones                               | 3.004E-02 | 6.008E-01 |
|           | Amyloid fiber formation                               | 4.409E-02 | 8.529E-01 |
|           | Base-Excision Repair, AP Site Formation               | 4.731E-02 | 8.529E-01 |
| Cluster 4 | Digestion                                             | 5.700E-05 | 2.171E-02 |
|           | Uptake of dietary cobalamins into enterocytes         | 7.930E-05 | 2.171E-02 |
|           | Digestion and absorption                              | 1.070E-04 | 2.171E-02 |
|           | Digestion of dietary lipid                            | 4.690E-04 | 7.125E-02 |
|           | Activation of Matrix Metalloproteinases               | 1.872E-03 | 2.265E-01 |
|           | Cobalamin (Cbl, vitamin B12) transport and metabolism | 7.529E-03 | 4.694E-01 |
|           | Digestion of dietary carbohydrate                     | 8.376E-03 | 4.694E-01 |

|  |                                                                  |           |           |
|--|------------------------------------------------------------------|-----------|-----------|
|  | Growth hormone receptor signaling                                | 9.207E-03 | 4.694E-01 |
|  | Alpha-defensins                                                  | 1.160E-02 | 4.694E-01 |
|  | CASP8 activity is inhibited                                      | 1.368E-02 | 4.694E-01 |
|  | Regulation of IFNG signaling                                     | 2.341E-02 | 4.694E-01 |
|  | Interleukin-6 signaling                                          | 2.618E-02 | 4.694E-01 |
|  | Prolactin receptor signaling                                     | 2.907E-02 | 4.694E-01 |
|  | CLEC7A (Dectin-1) induces NFAT activation                        | 2.907E-02 | 4.694E-01 |
|  | Transcriptional regulation by RUNX3                              | 3.076E-02 | 4.694E-01 |
|  | Caspase activation via Death Receptors in the presence of ligand | 3.522E-02 | 4.694E-01 |
|  | ABC-family proteins mediated transport                           | 3.680E-02 | 4.694E-01 |
|  | FOXO-mediated transcription of cell death genes                  | 4.527E-02 | 4.694E-01 |

**Table S4** List of pathways discovered by the specific genes of each cluster by KEGG, which P-value is less than 0.05.

|           | ID       | Pathway name                    | P-value   | P.adjust  |
|-----------|----------|---------------------------------|-----------|-----------|
| Cluster 1 | hsa05016 | Huntington disease              | 4.343E-04 | 4.734E-02 |
| Cluster 2 | hsa05150 | Staphylococcus aureus infection | 8.209E-07 | 1.543E-04 |
|           | hsa04380 | Osteoclast differentiation      | 6.862E-05 | 6.451E-03 |

|           |          |                                           |           |           |
|-----------|----------|-------------------------------------------|-----------|-----------|
|           | hsa04060 | Cytokine-cytokine receptor interaction    | 3.207E-04 | 2.010E-02 |
|           | hsa04062 | Chemokine signaling pathway               | 1.080E-03 | 4.065E-02 |
|           | hsa04145 | Phagosome                                 | 1.256E-03 | 4.065E-02 |
|           | hsa05140 | Leishmaniasis                             | 1.429E-03 | 4.065E-02 |
|           | hsa04612 | Antigen processing and presentation       | 1.514E-03 | 4.065E-02 |
|           | hsa04662 | B cell receptor signaling pathway         | 1.891E-03 | 4.445E-02 |
|           | hsa04610 | Complement and coagulation cascades       | 2.334E-03 | 4.875E-02 |
| Cluster 3 | hsa05418 | Fluid shear stress and atherosclerosis    | 2.243E-06 | 4.958E-04 |
|           | hsa04145 | Phagosome                                 | 3.376E-05 | 3.730E-03 |
|           | hsa04640 | Hematopoietic cell lineage                | 3.454E-04 | 1.960E-02 |
|           | hsa04650 | Natural killer cell mediated cytotoxicity | 3.547E-04 | 1.960E-02 |
| Cluster 4 | hsa04972 | Pancreatic secretion                      | 5.675E-09 | 9.193E-07 |
|           | hsa04974 | Protein digestion and absorption          | 1.525E-05 | 1.235E-03 |
|           | hsa04975 | Fat digestion and absorption              | 3.499E-04 | 1.890E-02 |

**Table S5** List of pathways discovered by the specific genes of each cluster by GO, which P-value is less than 0.05.

|           | ONTOLOGY | ID         | Pathway name                                      | P-value   | P.adjust  |
|-----------|----------|------------|---------------------------------------------------|-----------|-----------|
| Cluster 2 | BP       | GO:0043312 | neutrophil degranulation                          | 7.988E-10 | 1.289E-06 |
|           | BP       | GO:0002283 | neutrophil activation involved in immune response | 8.921E-10 | 1.289E-06 |
|           | BP       | GO:0002687 | positive regulation of leukocyte migration        | 3.118E-06 | 2.528E-03 |
|           | BP       | GO:0050921 | positive regulation of chemotaxis                 | 3.499E-06 | 2.528E-03 |
|           | BP       | GO:1902105 | regulation of leukocyte differentiation           | 6.212E-06 | 3.590E-03 |
|           | BP       | GO:0002685 | regulation of leukocyte migration                 | 1.223E-05 | 5.688E-03 |
|           | BP       | GO:0050727 | regulation of inflammatory response               | 1.408E-05 | 5.688E-03 |
|           | BP       | GO:0002690 | positive regulation of leukocyte chemotaxis       | 1.615E-05 | 5.688E-03 |
|           | BP       | GO:0097529 | myeloid leukocyte migration                       | 1.823E-05 | 5.688E-03 |
|           | BP       | GO:0015939 | pantothenate metabolic process                    | 1.968E-05 | 5.688E-03 |
|           | BP       | GO:0043254 | regulation of protein-containing complex assembly | 2.588E-05 | 6.799E-03 |
|           | BP       | GO:0030041 | actin filament polymerization                     | 3.683E-05 | 8.869E-03 |

|  |    |            |                                                                    |           |           |
|--|----|------------|--------------------------------------------------------------------|-----------|-----------|
|  | BP | GO:0002526 | acute inflammatory response                                        | 4.144E-05 | 9.212E-03 |
|  | BP | GO:1902107 | positive regulation of leukocyte differentiation                   | 5.896E-05 | 1.160E-02 |
|  | BP | GO:0090023 | positive regulation of neutrophil chemotaxis                       | 6.132E-05 | 1.160E-02 |
|  | BP | GO:0060326 | cell chemotaxis                                                    | 6.419E-05 | 1.160E-02 |
|  | BP | GO:0038112 | interleukin-8-mediated signaling pathway                           | 6.970E-05 | 1.185E-02 |
|  | BP | GO:0002688 | regulation of leukocyte chemotaxis                                 | 8.389E-05 | 1.347E-02 |
|  | BP | GO:0098883 | synapse pruning                                                    | 9.052E-05 | 1.377E-02 |
|  | BP | GO:0071624 | positive regulation of granulocyte chemotaxis                      | 9.554E-05 | 1.380E-02 |
|  | BP | GO:0008154 | actin polymerization or depolymerization                           | 1.047E-04 | 1.441E-02 |
|  | BP | GO:0030833 | regulation of actin filament polymerization                        | 1.108E-04 | 1.456E-02 |
|  | BP | GO:0006766 | vitamin metabolic process                                          | 1.184E-04 | 1.488E-02 |
|  | BP | GO:1902624 | positive regulation of neutrophil migration                        | 1.249E-04 | 1.504E-02 |
|  | BP | GO:0050920 | regulation of chemotaxis                                           | 1.371E-04 | 1.585E-02 |
|  | BP | GO:0030595 | leukocyte chemotaxis                                               | 1.512E-04 | 1.655E-02 |
|  | BP | GO:1902563 | regulation of neutrophil activation                                | 1.550E-04 | 1.655E-02 |
|  | BP | GO:0090022 | regulation of neutrophil chemotaxis                                | 1.604E-04 | 1.655E-02 |
|  | BP | GO:0035589 | G protein-coupled purinergic nucleotide receptor signaling pathway | 1.960E-04 | 1.689E-02 |
|  | BP | GO:0008064 | regulation of actin polymerization or depolymerization             | 2.030E-04 | 1.689E-02 |
|  | BP | GO:0001810 | regulation of type I hypersensitivity                              | 2.079E-04 | 1.689E-02 |
|  | BP | GO:0016068 | type I hypersensitivity                                            | 2.079E-04 | 1.689E-02 |
|  | BP | GO:0098758 | response to interleukin-8                                          | 2.079E-04 | 1.689E-02 |
|  | BP | GO:0098759 | cellular response to interleukin-8                                 | 2.079E-04 | 1.689E-02 |
|  | BP | GO:0150064 | vertebrate eye-specific patterning                                 | 2.079E-04 | 1.689E-02 |
|  | BP | GO:0030832 | regulation of actin filament length                                | 2.104E-04 | 1.689E-02 |
|  | BP | GO:0030593 | neutrophil chemotaxis                                              | 2.297E-04 | 1.794E-02 |

|  |    |            |                                                                                                                            |           |           |
|--|----|------------|----------------------------------------------------------------------------------------------------------------------------|-----------|-----------|
|  | BP | GO:2001028 | positive regulation of endothelial cell chemotaxis                                                                         | 2.435E-04 | 1.852E-02 |
|  | BP | GO:1903706 | regulation of hemopoiesis                                                                                                  | 2.948E-04 | 2.185E-02 |
|  | BP | GO:1903708 | positive regulation of hemopoiesis                                                                                         | 3.284E-04 | 2.359E-02 |
|  | BP | GO:0022407 | regulation of cell-cell adhesion                                                                                           | 3.347E-04 | 2.359E-02 |
|  | BP | GO:0043117 | positive regulation of vascular permeability                                                                               | 3.595E-04 | 2.455E-02 |
|  | BP | GO:0006801 | superoxide metabolic process                                                                                               | 3.911E-04 | 2.455E-02 |
|  | BP | GO:0032535 | regulation of cellular component size                                                                                      | 3.924E-04 | 2.455E-02 |
|  | BP | GO:0043315 | positive regulation of neutrophil degranulation                                                                            | 4.136E-04 | 2.455E-02 |
|  | BP | GO:0150062 | complement-mediated synapse pruning                                                                                        | 4.136E-04 | 2.455E-02 |
|  | BP | GO:1902565 | positive regulation of neutrophil activation                                                                               | 4.136E-04 | 2.455E-02 |
|  | BP | GO:1902622 | regulation of neutrophil migration                                                                                         | 4.137E-04 | 2.455E-02 |
|  | BP | GO:0061844 | antimicrobial humoral immune response mediated by antimicrobial peptide                                                    | 4.162E-04 | 2.455E-02 |
|  | BP | GO:1903037 | regulation of leukocyte cell-cell adhesion                                                                                 | 4.654E-04 | 2.664E-02 |
|  | BP | GO:0019932 | second-messenger-mediated signaling                                                                                        | 4.702E-04 | 2.664E-02 |
|  | BP | GO:0150146 | cell junction disassembly                                                                                                  | 5.061E-04 | 2.813E-02 |
|  | BP | GO:0043114 | regulation of vascular permeability                                                                                        | 5.401E-04 | 2.945E-02 |
|  | BP | GO:1990266 | neutrophil migration                                                                                                       | 5.702E-04 | 3.052E-02 |
|  | BP | GO:0002761 | regulation of myeloid leukocyte differentiation                                                                            | 5.954E-04 | 3.128E-02 |
|  | BP | GO:0001906 | cell killing                                                                                                               | 6.232E-04 | 3.180E-02 |
|  | BP | GO:0002696 | positive regulation of leukocyte activation                                                                                | 6.378E-04 | 3.180E-02 |
|  | BP | GO:0030225 | macrophage differentiation                                                                                                 | 6.382E-04 | 3.180E-02 |
|  | BP | GO:0038033 | positive regulation of endothelial cell chemotaxis by VEGF-activated vascular endothelial growth factor receptor signaling | 6.855E-04 | 3.292E-02 |

|  |    |            |                                                                    |           |           |
|--|----|------------|--------------------------------------------------------------------|-----------|-----------|
|  |    |            | pathway                                                            |           |           |
|  | BP | GO:1905907 | negative regulation of amyloid fibril formation                    | 6.855E-04 | 3.292E-02 |
|  | BP | GO:0071621 | granulocyte chemotaxis                                             | 7.047E-04 | 3.292E-02 |
|  | BP | GO:0006767 | water-soluble vitamin metabolic process                            | 7.397E-04 | 3.292E-02 |
|  | BP | GO:0032271 | regulation of protein polymerization                               | 7.467E-04 | 3.292E-02 |
|  | BP | GO:0002673 | regulation of acute inflammatory response                          | 7.484E-04 | 3.292E-02 |
|  | BP | GO:0002429 | immune response-activating cell surface receptor signaling pathway | 7.518E-04 | 3.292E-02 |
|  | BP | GO:0002757 | immune response-activating signal transduction                     | 7.518E-04 | 3.292E-02 |
|  | BP | GO:1903039 | positive regulation of leukocyte cell-cell adhesion                | 8.347E-04 | 3.600E-02 |
|  | BP | GO:0050867 | positive regulation of cell activation                             | 8.584E-04 | 3.627E-02 |
|  | BP | GO:0014068 | positive regulation of phosphatidylinositol 3-kinase signaling     | 8.659E-04 | 3.627E-02 |
|  | BP | GO:0071622 | regulation of granulocyte chemotaxis                               | 9.378E-04 | 3.872E-02 |
|  | BP | GO:0051258 | protein polymerization                                             | 9.797E-04 | 3.938E-02 |
|  | BP | GO:0045785 | positive regulation of cell adhesion                               | 9.812E-04 | 3.938E-02 |
|  | BP | GO:0007159 | leukocyte cell-cell adhesion                                       | 1.011E-03 | 4.003E-02 |
|  | BP | GO:0002438 | acute inflammatory response to antigenic stimulus                  | 1.025E-03 | 4.003E-02 |
|  | BP | GO:0050808 | synapse organization                                               | 1.078E-03 | 4.152E-02 |
|  | BP | GO:0071216 | cellular response to biotic stimulus                               | 1.120E-03 | 4.260E-02 |
|  | BP | GO:2001026 | regulation of endothelial cell chemotaxis                          | 1.158E-03 | 4.345E-02 |
|  | BP | GO:1902903 | regulation of supramolecular fiber organization                    | 1.215E-03 | 4.500E-02 |
|  | BP | GO:0031333 | negative regulation of protein-containing complex assembly         | 1.259E-03 | 4.605E-02 |



|           |    |            |                                                                                               |           |           |
|-----------|----|------------|-----------------------------------------------------------------------------------------------|-----------|-----------|
|           | BP | GO:0050728 | negative regulation of inflammatory response                                                  | 1.337E-03 | 4.830E-02 |
|           | BP | GO:0048010 | vascular endothelial growth factor receptor signaling pathway                                 | 1.404E-03 | 4.899E-02 |
|           | BP | GO:0002886 | regulation of myeloid leukocyte mediated immunity                                             | 1.414E-03 | 4.899E-02 |
|           | BP | GO:1903793 | positive regulation of anion transport                                                        | 1.414E-03 | 4.899E-02 |
|           | BP | GO:0038089 | positive regulation of cell migration by vascular endothelial growth factor signaling pathway | 1.424E-03 | 4.899E-02 |
|           | BP | GO:0006909 | phagocytosis                                                                                  | 1.451E-03 | 4.932E-02 |
|           | CC | GO:0070820 | tertiary granule                                                                              | 1.787E-07 | 5.147E-05 |
|           | CC | GO:0030667 | secretory granule membrane                                                                    | 4.233E-07 | 6.096E-05 |
|           | CC | GO:0070821 | tertiary granule membrane                                                                     | 3.884E-05 | 3.729E-03 |
|           | MF | GO:0017159 | pantetheine hydrolase activity                                                                | 6.382E-07 | 2.929E-04 |
|           | MF | GO:0140375 | immune receptor activity                                                                      | 2.701E-06 | 6.200E-04 |
|           | MF | GO:0019865 | immunoglobulin binding                                                                        | 5.036E-05 | 7.705E-03 |
|           | MF | GO:0004918 | interleukin-8 receptor activity                                                               | 7.460E-05 | 8.560E-03 |
|           | MF | GO:0019864 | IgG binding                                                                                   | 1.001E-04 | 9.186E-03 |
|           | MF | GO:0045028 | G protein-coupled purinergic nucleotide receptor activity                                     | 2.166E-04 | 1.459E-02 |
|           | MF | GO:0019959 | interleukin-8 binding                                                                         | 2.225E-04 | 1.459E-02 |
|           | MF | GO:0033218 | amide binding                                                                                 | 4.983E-04 | 2.795E-02 |
|           | MF | GO:0001540 | amyloid-beta binding                                                                          | 5.480E-04 | 2.795E-02 |
|           | MF | GO:0019763 | immunoglobulin receptor activity                                                              | 7.333E-04 | 2.895E-02 |
|           | MF | GO:0001614 | purinergic nucleotide receptor activity                                                       | 7.568E-04 | 2.895E-02 |
|           | MF | GO:0016502 | nucleotide receptor activity                                                                  | 7.568E-04 | 2.895E-02 |
|           | MF | GO:0019958 | C-X-C chemokine binding                                                                       | 1.094E-03 | 3.861E-02 |
|           | MF | GO:0004896 | cytokine receptor activity                                                                    | 1.556E-03 | 4.903E-02 |
|           | MF | GO:0044183 | protein folding chaperone                                                                     | 1.602E-03 | 4.903E-02 |
| Cluster 3 | BP | GO:0002699 | positive regulation of immune effector process                                                | 6.470E-07 | 2.038E-03 |
|           | BP | GO:0006909 | phagocytosis                                                                                  | 1.126E-06 | 2.038E-03 |

|  |    |            |                                                                              |           |           |
|--|----|------------|------------------------------------------------------------------------------|-----------|-----------|
|  | BP | GO:0042110 | T cell activation                                                            | 7.892E-06 | 8.211E-03 |
|  | BP | GO:0031343 | positive regulation of cell killing                                          | 9.108E-06 | 8.211E-03 |
|  | BP | GO:0002703 | regulation of leukocyte mediated immunity                                    | 1.134E-05 | 8.211E-03 |
|  | BP | GO:0031341 | regulation of cell killing                                                   | 1.668E-05 | 1.006E-02 |
|  | BP | GO:0002221 | pattern recognition receptor signaling pathway                               | 3.758E-05 | 1.622E-02 |
|  | BP | GO:1903557 | positive regulation of tumor necrosis factor superfamily cytokine production | 3.919E-05 | 1.622E-02 |
|  | BP | GO:0002705 | positive regulation of leukocyte mediated immunity                           | 4.994E-05 | 1.622E-02 |
|  | BP | GO:0001906 | cell killing                                                                 | 5.104E-05 | 1.622E-02 |
|  | BP | GO:0001909 | leukocyte mediated cytotoxicity                                              | 5.338E-05 | 1.622E-02 |
|  | BP | GO:0010922 | positive regulation of phosphatase activity                                  | 5.377E-05 | 1.622E-02 |
|  | BP | GO:0050863 | regulation of T cell activation                                              | 6.068E-05 | 1.690E-02 |
|  | BP | GO:0043312 | neutrophil degranulation                                                     | 1.052E-04 | 2.720E-02 |
|  | BP | GO:0002283 | neutrophil activation involved in immune response                            | 1.133E-04 | 2.733E-02 |
|  | BP | GO:0034125 | negative regulation of MyD88-dependent toll-like receptor signaling pathway  | 1.480E-04 | 2.820E-02 |
|  | BP | GO:0034758 | positive regulation of iron ion transport                                    | 1.480E-04 | 2.820E-02 |
|  | BP | GO:0034761 | positive regulation of iron ion transmembrane transport                      | 1.480E-04 | 2.820E-02 |
|  | BP | GO:1904440 | positive regulation of iron ion import across plasma membrane                | 1.480E-04 | 2.820E-02 |
|  | BP | GO:0050766 | positive regulation of phagocytosis                                          | 1.792E-04 | 3.191E-02 |
|  | BP | GO:0050764 | regulation of phagocytosis                                                   | 1.851E-04 | 3.191E-02 |
|  | BP | GO:0002697 | regulation of immune effector process                                        | 2.231E-04 | 3.671E-02 |
|  | BP | GO:1902105 | regulation of leukocyte                                                      | 2.425E-04 | 3.816E-02 |

|           |    |            |                                                                     |           |           |
|-----------|----|------------|---------------------------------------------------------------------|-----------|-----------|
|           |    |            | differentiation                                                     |           |           |
|           | BP | GO:0030217 | T cell differentiation                                              | 2.883E-04 | 4.139E-02 |
|           | BP | GO:0001910 | regulation of leukocyte mediated cytotoxicity                       | 3.071E-04 | 4.139E-02 |
|           | BP | GO:0050870 | positive regulation of T cell activation                            | 3.071E-04 | 4.139E-02 |
|           | BP | GO:0002448 | mast cell mediated immunity                                         | 3.176E-04 | 4.139E-02 |
|           | BP | GO:0002708 | positive regulation of lymphocyte mediated immunity                 | 3.201E-04 | 4.139E-02 |
|           | BP | GO:0032760 | positive regulation of tumor necrosis factor production             | 3.494E-04 | 4.362E-02 |
|           | BP | GO:0001912 | positive regulation of leukocyte mediated cytotoxicity              | 4.203E-04 | 4.689E-02 |
|           | BP | GO:0046631 | alpha-beta T cell activation                                        | 4.304E-04 | 4.689E-02 |
|           | BP | GO:0060557 | positive regulation of vitamin D biosynthetic process               | 4.404E-04 | 4.689E-02 |
|           | BP | GO:0060559 | positive regulation of calcidiol 1-monooxygenase activity           | 4.404E-04 | 4.689E-02 |
|           | BP | GO:1904438 | regulation of iron ion import across plasma membrane                | 4.404E-04 | 4.689E-02 |
|           | BP | GO:1903555 | regulation of tumor necrosis factor superfamily cytokine production | 4.722E-04 | 4.884E-02 |
|           | CC | GO:0042101 | T cell receptor complex                                             | 1.825E-06 | 5.653E-04 |
|           | CC | GO:0030139 | endocytic vesicle                                                   | 2.812E-06 | 5.653E-04 |
|           | CC | GO:0045334 | clathrin-coated endocytic vesicle                                   | 1.027E-04 | 1.376E-02 |
|           | CC | GO:0098802 | plasma membrane signaling receptor complex                          | 1.651E-04 | 1.659E-02 |
|           | MF | GO:0030898 | actin-dependent ATPase activity                                     | 8.167E-06 | 4.574E-03 |
|           | MF | GO:0000146 | microfilament motor activity                                        | 2.174E-05 | 6.086E-03 |
| Cluster 4 | MF | GO:0004252 | serine-type endopeptidase activity                                  | 1.799E-06 | 6.015E-04 |
|           | MF | GO:0008236 | serine-type peptidase activity                                      | 4.137E-06 | 6.015E-04 |

|  |    |            |                                                                        |           |           |
|--|----|------------|------------------------------------------------------------------------|-----------|-----------|
|  | MF | GO:0017171 | serine hydrolase activity                                              | 4.917E-06 | 6.015E-04 |
|  | MF | GO:0004175 | endopeptidase activity                                                 | 6.790E-06 | 6.230E-04 |
|  | BP | GO:0007586 | digestion                                                              | 3.985E-06 | 1.011E-02 |
|  | BP | GO:0009235 | cobalamin metabolic process                                            | 1.149E-05 | 1.458E-02 |
|  | BP | GO:0002474 | antigen processing and presentation of peptide antigen via MHC class I | 4.642E-05 | 3.060E-02 |
|  | BP | GO:0033013 | tetrapyrrole metabolic process                                         | 4.823E-05 | 3.060E-02 |

**Table S6** List of pathways discovered by the top 25 genes of each cluster by Reactome, which P-value is less than 0.05.

|           | Pathway name                                                        | Entities pValue | Entities FDR |
|-----------|---------------------------------------------------------------------|-----------------|--------------|
| Cluster 1 | Transcriptional regulation of pluripotent stem cells                | 3.070E-03       | 2.390E-01    |
|           | POU5F1 (OCT4), SOX2, NANOG repress genes related to differentiation | 1.810E-02       | 2.390E-01    |
|           | Metallothioneins bind metals                                        | 2.870E-02       | 2.390E-01    |
|           | POU5F1 (OCT4), SOX2, NANOG activate genes related to proliferation  | 3.760E-02       | 2.390E-01    |
|           | Response to metal ions                                              | 3.760E-02       | 2.390E-01    |

|           |                                                                                   |           |           |
|-----------|-----------------------------------------------------------------------------------|-----------|-----------|
|           | Microtubule-dependent trafficking of connexons from Golgi to the plasma membrane  | 3.930E-02 | 2.390E-01 |
|           | Transport of connexons to the plasma membrane                                     | 4.110E-02 | 2.390E-01 |
|           | Post-chaperonin tubulin folding pathway                                           | 4.460E-02 | 2.390E-01 |
| Cluster 2 | Transcriptional regulation by the AP-2 (TFAP2) family of transcription factors    | 5.130E-06 | 5.640E-04 |
|           | VEGF ligand-receptor interactions                                                 | 1.450E-04 | 5.200E-03 |
|           | VEGF binds to VEGFR leading to receptor dimerization                              | 1.450E-04 | 5.200E-03 |
|           | Signaling by VEGF                                                                 | 2.230E-04 | 6.030E-03 |
|           | Regulation of gene expression by Hypoxia-inducible Factor                         | 5.030E-04 | 1.110E-02 |
|           | TFAP2 (AP-2) family regulates transcription of growth factors and their receptors | 9.790E-04 | 1.640E-02 |

|  |                                                                                   |           |           |
|--|-----------------------------------------------------------------------------------|-----------|-----------|
|  | Interleukin-4 and Interleukin-13 signaling                                        | 1.090E-03 | 1.640E-02 |
|  | Signaling by Receptor Tyrosine Kinases                                            | 1.900E-03 | 2.480E-02 |
|  | Glucagon-type ligand receptors                                                    | 2.670E-03 | 2.930E-02 |
|  | Vitamin B5 (pantothenate) metabolism                                              | 2.670E-03 | 2.930E-02 |
|  | nucleus signaling by ERBB4                                                        | 4.730E-03 | 4.730E-02 |
|  | NR1H3 & NR1H2 regulate gene expression linked to cholesterol transport and efflux | 9.100E-03 | 8.190E-02 |
|  | Signaling by ERBB4                                                                | 1.370E-02 | 1.030E-01 |
|  | NR1H2 and NR1H3-mediated signaling                                                | 1.470E-02 | 1.030E-01 |
|  | Cellular response to hypoxia                                                      | 1.500E-02 | 1.050E-01 |
|  | Chylomicron clearance                                                             | 1.940E-02 | 1.160E-01 |
|  | Class B/2 (Secretin family receptors)                                             | 1.960E-02 | 1.180E-01 |
|  | Insulin-like Growth Factor-2 mRNA Binding Proteins (IGF2BPs/IMPs/VICKZs) bind RNA | 2.790E-02 | 1.390E-01 |

|           |                                                                   |           |           |
|-----------|-------------------------------------------------------------------|-----------|-----------|
|           | Cross-presentation of particulate exogenous antigens (phagosomes) | 2.790E-02 | 1.390E-01 |
|           | Chylomicron assembly                                              | 3.000E-02 | 1.500E-01 |
|           | VEGFA-VEGFR2 Pathway                                              | 3.100E-02 | 1.500E-01 |
|           | Chylomicron remodeling                                            | 3.630E-02 | 1.500E-01 |
|           | Platelet degranulation                                            | 3.760E-02 | 1.500E-01 |
|           | Response to elevated platelet cytosolic Ca <sup>2+</sup>          | 4.100E-02 | 1.530E-01 |
|           | ADORA2B mediated anti-inflammatory cytokines production           | 4.660E-02 | 1.530E-01 |
|           | Metabolism of vitamins and cofactors                              | 4.850E-02 | 1.530E-01 |
|           | Signaling by Interleukins                                         | 4.920E-02 | 1.530E-01 |
| Cluster 3 | ATF4 activates genes in response to endoplasmic reticulum stress  | 1.780E-03 | 1.560E-01 |
|           | PERK regulates gene expression                                    | 2.690E-03 | 1.560E-01 |

|           |                                                                               |           |           |
|-----------|-------------------------------------------------------------------------------|-----------|-----------|
|           | FOXO-mediated transcription of oxidative stress, metabolic and neuronal genes | 3.630E-03 | 1.560E-01 |
|           | FOXO-mediated transcription                                                   | 1.710E-02 | 1.810E-01 |
| Cluster 4 | Digestion of dietary carbohydrate                                             | 3.640E-04 | 1.490E-02 |
|           | Cobalamin (Cbl, vitamin B12) transport and metabolism                         | 1.100E-03 | 1.860E-02 |
|           | Digestion                                                                     | 1.430E-03 | 1.860E-02 |
|           | Digestion and absorption                                                      | 2.080E-03 | 2.080E-02 |
|           | Activation of Matrix Metalloproteinases                                       | 2.670E-03 | 2.140E-02 |
|           | Metabolism of water-soluble vitamins and cofactors                            | 3.420E-02 | 2050E-01  |
|           | Degradation of the extracellular matrix                                       | 4.140E-02 | 2.070E-01 |
|           | ER Quality Control Compartment (ERQC)                                         | 4.750E-02 | 2.170E-01 |

For instance, the most significant pathway (p-value = 5.13E-6) related to Cluster 2 is “Transcription regulation by the AP-2 (TFAP2) family of transcription factors”. Five proteins (TFAP2A, TFAP2B, TFAP2C, TFAP2D, TFAP2E) are included in the AP-2 family of transcription factors. The AP-2



family of transcription factors regulates the gene expression by interacting with the transcriptional co-factors of the CITED family and recruiting transcription co-activators to TFAP2-bound DNA elements. The AP-2 family relates to breast cancer and mammary development. De et al. [1] had reported that TFAP2C regulates EGFR in luminal breast cancer as well as HER2 breast cancer. Cyr et al. [2] had reported that the knockdown of TFAP2C in luminal breast carcinoma cells induces the loss of luminal-associated gene expression in contrast to the gain of the basal-associated gene expression. It also pointed out that TFAP2C is the key factor to maintaining the luminal breast carcinoma, and Tcfap2c influences the luminal cells in the mammary. While Bogachek et al. [3] had reported that the sumoylation of TFAP2A maintains the basal breast cancer phenotype. Also, the most significant pathway (p-value = 1.78E-3) related to Cluster 3 is "ATF4 activates genes in response to endoplasmic reticulum stress". ATF4 is a transcription factor and ATF4 activates 6 genes expression including IL-8, MCP1, IGFBP-1, CHOP, HERP1, and ATF3. Marchand et al. [4] had reported that insulin-like growth factor binding protein 1 (IGFBP1) is induced during the Endoplasmic reticulum (ER) stress in human hepatocytes. It pointed out that the region of the human IGFBP1 gene containing an activating transcription factor 4 (ATF4) composite site is required for the activation of ER stress. Armstrong et al. [5] had reported that ATF4 induces the ER stress-induced cell death of neuroectodermal tumor cells which induced by the chemotherapeutic agents fenretinide and bortezomib.

1. De-Andrade, J.P.; Park, J.M.; Gu, V.W.; et al. EGFR Is Regulated by TFAP2C in Luminal Breast Cancer and Is a Target for Vandetanib. *TFAP2C Regulates Breast Cancer through EGFR. Molecular cancer therapeutics* 2016, 15(3): 503-511. <https://doi.org/10.1158/1535-7163.MCT-15-0548-T>
2. Cyr, A.R.; Kulak, M.V.; Park, J.M.; et al. TFAP2C governs the luminal epithelial phenotype in mammary development and carcinogenesis. *Oncogene* 2015, 34(4): 436-444. <https://doi.org/10.1038/onc.2013.569>
3. Bogachek, M.V.; Chen, Y.; Kulak, M.V.; et al. Sumoylation pathway is required to maintain the basal breast cancer subtype. *Cancer cell* 2014, 25(6): 748-761. <https://doi.org/10.1016/j.ccr.2014.04.008>
4. Marchand, A.; Tomkiewicz, C.; Magne, L.; et al. Endoplasmic reticulum stress induction of insulin-like growth fac-tor-binding protein-1 involves ATF4. *Journal of Biological Chemistry* 2006, 281(28): 19124-19133. <https://doi.org/10.1074/jbc.M602157200>
5. Armstrong, J.L.; Flockhart, R.; Veal, G.J.; et al. Regulation of endoplasmic reticulum stress-induced cell death by ATF4 in neuroectodermal tumor cells. *Journal of Biological Chemistry* 2010, 285(9): 6091-6100. <https://doi.org/10.1074/jbc.M109.014092>
